# Supplementary material for: Differential but Concerted Expression of HSD17B2, HSD17B3, SHBG and SRD5A1 Testosterone Tetrad Modulate Therapy Response and Susceptibility to Disease Relapse in Patients with Prostate Cancer
Source: MDPI journal article supplement (doi:10.3390/cancers13143478), 2021-07-12
Supplement: s1 [file s1]

# Differential but Concerted Expression of HSD17B2, HSD17B3, SHBG and SRD5A1 Testosterone Tetrad Modulate Therapy Response and Susceptibility to Disease Relapse in Patients with Prostate Cancer

Oluwaseun Adebayo Bamodu, Kai-Yi Tzou, Chia-Da Lin, Su-Wei Hu, Yuan-Hung Wang, Wen-Ling Wu, Kuan-Chou Chen and Chia-Chang Wu

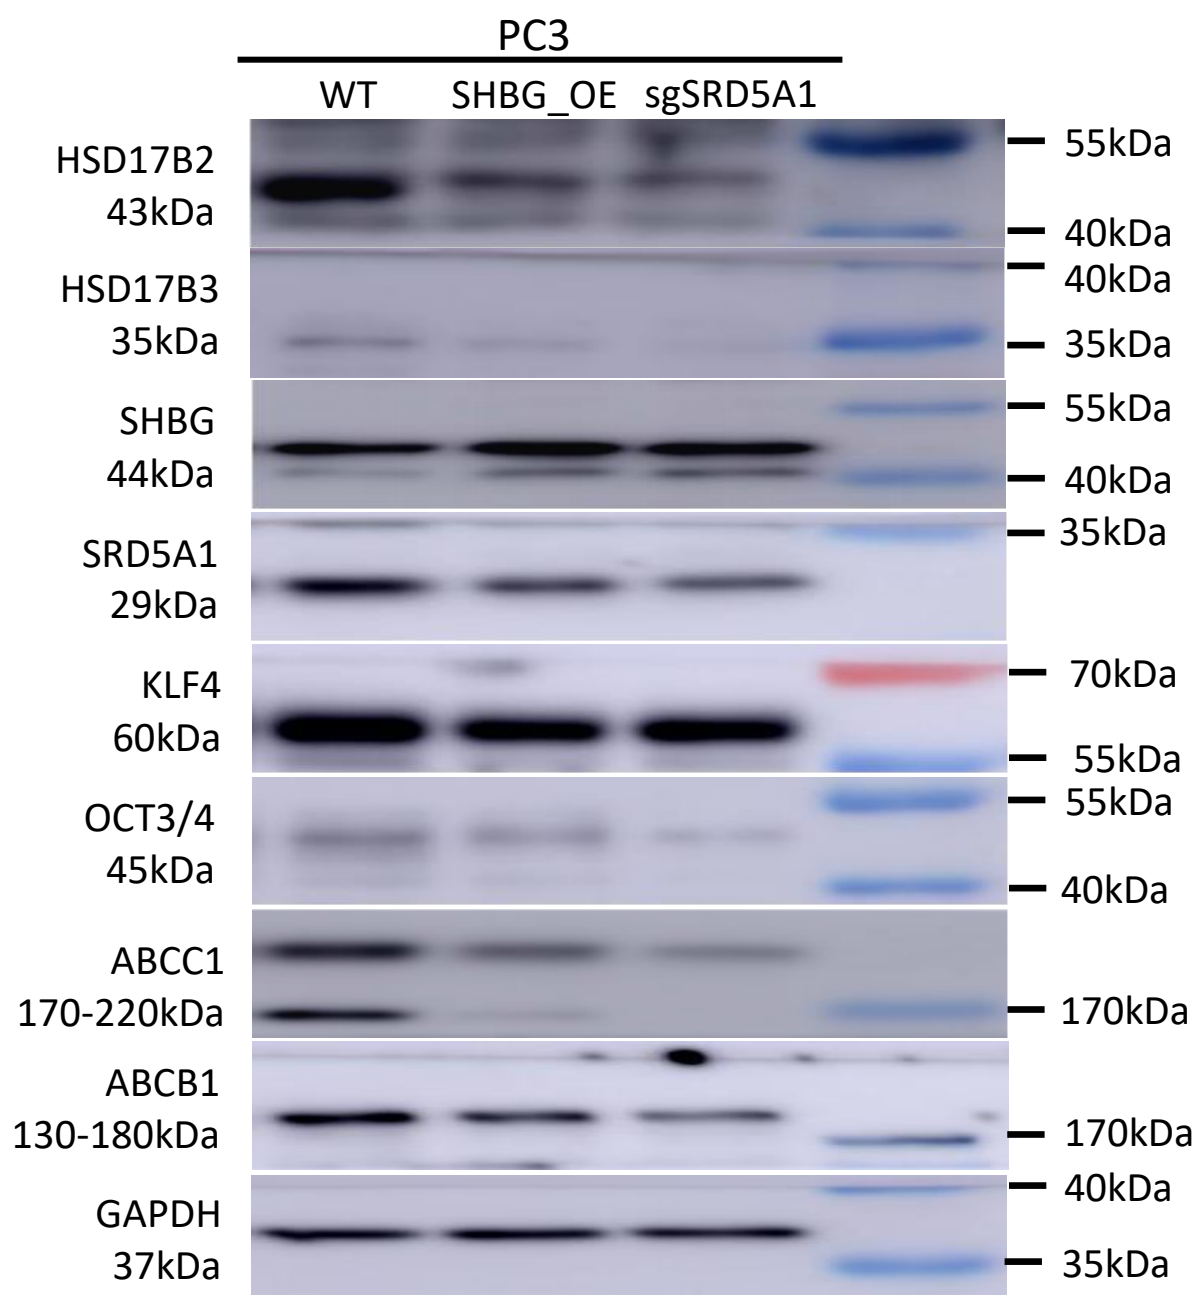

**Figure S1:** Original western blots of Figure 5F.
