# Supplementary material for: Differential but Concerted Expression of HSD17B2, HSD17B3, SHBG and SRD5A1 Testosterone Tetrad Modulate Therapy Response and Susceptibility to Disease Relapse in Patients with Prostate Cancer
Source: MDPI journal article supplement (doi:10.3390/cancers13143478), 2021-07-12
Supplement: s1 [file s1]

# Differential but Concerted Expression of HSD17B2, HSD17B3, SHBG and SRD5A1 Testosterone Tetrad Modulate Therapy Response and Susceptibility to Disease Relapse in Patients with Prostate Cancer

Oluwaseun Adebayo Bamodu, Kai-Yi Tzou, Chia-Da Lin, Su-Wei Hu, Yuan-Hung Wang, Wen-Ling Wu, Kuan-Chou Chen and Chia-Chang Wu

**Table S1.** Predictors effect size statistics.

|                                                 | t-statistic | df  | p-value | Effect size<br>(Cohen's d) | 95% Confidence Interval |       |
|-------------------------------------------------|-------------|-----|---------|----------------------------|-------------------------|-------|
|                                                 |             |     |         |                            | Lower                   | Upper |
| HSD17B2                                         | 90.83       | 550 | < 0.001 | 3.87                       | 3.62                    | 4.11  |
| HSD17B3                                         | 163.80      | 550 | < 0.001 | 6.98                       | 6.55                    | 7.40  |
| SHBG                                            | 280.78      | 550 | < 0.001 | 11.96                      | 11.24                   | 12.67 |
| SRD5A1                                          | 646.45      | 550 | < 0.001 | 27.54                      | 25.90                   | 29.16 |
| Age at diagnosis                                | 224.97      | 611 | < 0.001 | 9.09                       | 8.57                    | 9.61  |
| Days to first BCR                               | 11.43       | 74  | < 0.001 | 1.32                       | 1.01                    | 1.63  |
| Days to new tumor event after initial treatment | 12.43       | 63  | < 0.001 | 1.55                       | 1.19                    | 1.92  |
| OS_time                                         | 34.78       | 622 | < 0.001 | 1.39                       | 1.28                    | 1.50  |
| PSA value                                       | 2.64        | 552 | 0.008   | 0.11                       | 0.03                    | 0.20  |
| BCR                                             | 8.74        | 533 |         | 0.38                       | 0.29                    | 0.47  |
| Primary therapy outcome success                 | 65.08       | 501 | < 0.001 | 2.91                       | 2.70                    | 3.10  |
| Gleason score                                   | 191.05      | 622 | < 0.001 | 7.65                       | 7.22                    | 8.08  |
| OS_time_5yrs                                    | 12.12       | 622 | < 0.001 | 0.49                       | 0.40                    | 0.57  |

BCR, biochemical recurrence; OS, overall survival; PSA, prostate specific antigen; dF, degrees of freedom.

**Table S2.** Model Comparison - Predict\_Recurrence\_Generalized Linear Model.

| Models                                                                                                                       | P(M)  | P(M data) | BF <sub>M</sub> | BF <sub>10</sub> | R <sup>2</sup> |
|------------------------------------------------------------------------------------------------------------------------------|-------|-----------|-----------------|------------------|----------------|
| ENSG00000086696.9 + ENSG00000130948.8 + ENSG00000129214.13 + ENSG00000145545.10                                              | 0.010 | 0.515     | 110.524         | 1.000            | 1.000          |
| ENSG00000086696.9 + ENSG00000130948.8 + ENSG00000129214.13 + ENSG00000145545.10 + psa_value                                  | 0.024 | 0.331     | 20.255          | 0.257            | 1.000          |
| ENSG00000086696.9 + ENSG00000130948.8 + ENSG00000129214.13 + ENSG00000145545.10 + psa_value + age_at_diagnosis.diagnoses_yrs | 0.143 | 0.094     | 0.622           | 0.012            | 1.000          |
| ENSG00000086696.9 + ENSG00000130948.8 + ENSG00000129214.13 + ENSG00000145545.10 + age_at_diagnosis.diagnoses_yrs             | 0.024 | 0.060     | 2.628           | 0.047            | 1.000          |
| Null model                                                                                                                   | 0.143 | 0.000     | 0.000           | 0.000            | 0.000          |
| ENSG00000145545.10 + psa_value + age_at_diagnosis.diagnoses_yrs                                                              | 0.007 | 0.000     | 0.000           | 0.000            | 0.072          |
| ENSG00000086696.9 + ENSG00000129214.13 + ENSG00000145545.10 + age_at_diagnosis.diagnoses_yrs                                 | 0.010 | 0.000     | 0.000           | 0.000            | 0.412          |
| ENSG00000130948.8 + ENSG00000129214.13 + ENSG00000145545.10 + psa_value                                                      | 0.010 | 0.000     | 0.000           | 0.000            | 0.913          |
| psa_value + age_at_diagnosis.diagnoses_yrs                                                                                   | 0.010 | 0.000     | 0.000           | 0.000            | 0.021          |
| ENSG00000129214.13 + ENSG00000145545.10                                                                                      | 0.010 | 0.000     | 0.000           | 0.000            | 0.318          |

Posterior Summaries of Coefficients - Predict\_Recurrence\_Generalized Linear Model.

| Coefficient                    | P(incl) | P(excl) | P(incl data) | P(excl data) | BF <sub>inclusion</sub> | Mean      | SD       | 95% Credible Interval |          |
|--------------------------------|---------|---------|--------------|--------------|-------------------------|-----------|----------|-----------------------|----------|
|                                |         |         |              |              |                         |           |          | Lower                 | Upper    |
| Intercept                      | 1.000   | 0.000   | 1.000        | 0.000        | 1.000                   | -6.333    | 1.261e-4 | -6.333                | -6.333   |
| ENSG00000086696.9              | 0.500   | 0.500   | 1.000        | 0.000        | ∞                       | 0.058     | 5.139e-5 | 0.058                 | 0.058    |
| ENSG00000130948.8              | 0.500   | 0.500   | 1.000        | 0.000        | ∞                       | 0.222     | 7.494e-5 | 0.222                 | 0.222    |
| ENSG00000129214.13             | 0.500   | 0.500   | 1.000        | 0.000        | ∞                       | -0.358    | 1.271e-4 | -0.358                | -0.358   |
| ENSG00000145545.10             | 0.500   | 0.500   | 1.000        | 0.000        | ∞                       | -0.213    | 2.293e-4 | -0.214                | -0.213   |
| psa_value                      | 0.500   | 0.500   | 0.425        | 0.575        | 0.738                   | -6.586e-6 | 9.411e-6 | -2.613e-5             | 0.000    |
| age_at_diagnosis.diagnoses_yrs | 0.500   | 0.500   | 0.154        | 0.846        | 0.182                   | -7.503e-7 | 7.663e-6 | -1.961e-5             | 1.399e-5 |

P(M), prior probabilities of the model; P(M|data), Posterior probability of the model based on the data; BF<sub>M</sub>, Bayes factor (likelihood odds) when compared against all other models; BF<sub>10</sub>, Bayes factor (likelihood odds) when compared against the null model; R<sup>2</sup>, coefficient of determination; P(Incl), prior probabilities of inclusion of the effect in all the models; P(excl), prior probabilities of exclusion of the effect in all the models; P(Incl|data), sum of the posterior probabilities of all models that include the effect; BF<sub>inclusion</sub>, prior to posterior odds of inclusion of a particular effect in all the considered models. Values below 1.0 are against the effect on the dependent variable. Values above 1.0 are for the effect on the dependent variable; SD, standard deviation.
